# Supplementary material
Source: PubMed Central journal article supplement (PMC7053005)
Supplement: jcsm.16.1.121.SD1.pdf [file jcsm.16.1.121.SD1.pdf]

**Supplemental Table - Behaviors Associated with N3 Interruptions, Hierarchically Arranged  
According to the Rasch model.**

| Behavior                               | Measure (SE)<br>(Logit*) | Mean Square |       |
|----------------------------------------|--------------------------|-------------|-------|
|                                        |                          | INFIT       | t     |
| Standing-up/walking                    | 3.600 (0.275)            | 1.01        | 0.21  |
| Screaming                              | 2.472 (0.109)            | 1.20        | 1.34  |
| Sitting                                | 1.948 (0.080)            | 0.90        | -1.20 |
| Interacting with the environment       | 1.704 (0.087)            | 1.07        | 1.04  |
| Trunk raising                          | 1.687 (0.068)            | 0.89        | -1.58 |
| Speaking                               | 1.431 (0.061)            | 1.17        | 2.80  |
| Showing an expression of fear/surprise | 1.339 (0.058)            | 0.97        | -0.56 |
| Exploring the environment              | 1.118 (0.054)            | 1.06        | 1.29  |
| Head raising                           | 0.628 (0.046)            | 0.92        | -1.85 |
| Eye opening                            | -0.108 (0.44)            | 0.90        | -2.60 |

SE: standard error; INFIT: information-weighted goodness-of-fit statistics;

\*Linear Rasch (rating scale model) - calibrated item logit.
